# Supplementary material for: Enhancing Kidney Transplant Outcomes: The Impact of Living Donor Programs
Source: MDPI journal article supplement (doi:10.3390/jpm14040408), 2024-04-12
Supplement: s1 [file s1]

## Supplementary Tables

**Table S1.-** Age, BMI, pre-transplant haemoglobin, pre-transplant creatinine, urine culture, post-transplant haemoglobin, post-transplant creatinine, pre-transplant systolic blood pressure, pre-transplant diastolic blood pressure, post-transplant systolic blood pressure, post-transplant diastolic blood pressure, ischemia time, duration of urethral catheterisation (days), duration of double-J stent (days)

| Variable                           | Group           | Mean  | SD    | Median | Range       | p-value |
|------------------------------------|-----------------|-------|-------|--------|-------------|---------|
| <b>Age</b>                         | <b>TV</b>       | 46.62 | 14.69 | 48.00  | 18.00-74.00 | 0.0004  |
|                                    | <b>TCpre11</b>  | 57.30 | 16.24 | 60.00  | 21.00-80.00 |         |
|                                    | <b>TCpost11</b> | 56.91 | 13.75 | 59.00  | 18.00-80.00 |         |
| <b>BMI</b>                         | <b>TV</b>       | 24.92 | 3.59  | 24.17  | 18.22-38.06 | 0.0002  |
|                                    | <b>TCpre11</b>  | 27.03 | 4.97  | 26.04  | 19.43-38.09 |         |
|                                    | <b>TCpost11</b> | 26.81 | 4.75  | 25.67  | 17.50-42.78 |         |
| <b>Pre-transplant haemoglobin</b>  | <b>TV</b>       | 12.05 | 1.89  | 11.60  | 9.00-17.80  | 0.060   |
|                                    | <b>TCpre11</b>  | 12.00 | 1.47  | 12.20  | 8.00-14.50  |         |
|                                    | <b>TCpost11</b> | 12.37 | 2.37  | 12.40  | 7.00-17.80  |         |
| <b>Pre-transplant creatinine</b>   | <b>TV</b>       | 7.00  | 8.64  | 5.83   | 0.60-61.60  | 0.007   |
|                                    | <b>TCpre11</b>  | 2.27  | 1.62  | 1.60   | 0.70-6.80   |         |
|                                    | <b>TCpost11</b> | 1.98  | 1.50  | 1.50   | 0.63-9.70   |         |
| <b>Urine culture</b>               | <b>TV</b>       | 1.00  | 0.69  | 1.00   | 0-5         | 0.0047  |
|                                    | <b>TCpre11</b>  | 3.67  | 3.33  | 3.00   | 0-13        |         |
|                                    | <b>TCpost11</b> | 3.01  | 3.25  | 1.00   | 0-13        |         |
| <b>Post-transplant haemoglobin</b> | <b>TV</b>       | 12.10 | 1.78  | 12.20  | 11.56-15.80 | 0.056   |
|                                    | <b>TCpre11</b>  | 12.05 | 1.27  | 12.10  | 12.00-15.50 |         |
|                                    | <b>TCpost11</b> | 12.30 | 1.37  | 12.34  | 11.20-16.80 |         |
| <b>Post-transplant creatinine</b>  | <b>TV</b>       | 1.41  |       | 1.26   | 1.41        | 0.0026  |
|                                    | <b>TCpre11</b>  | 1.30  | 0.52  | 1.30   | 0.80-2.70   |         |

|                                                |          |        |       |        |           |        |
|------------------------------------------------|----------|--------|-------|--------|-----------|--------|
|                                                | TCpost11 | 1.60   | 1.25  | 1.60   | 0.70-9.70 |        |
| Pre-transplant<br>systolic blood<br>pressure   | TV       | 134.07 | 15.40 | 130.00 | 101-185   | 0.0001 |
|                                                | TCpre11  | 133.39 | 20.05 | 130.00 | 99-163    |        |
|                                                | TCpost11 | 138.80 | 18.17 | 137.00 | 73-190    |        |
| Pre-transplant<br>diastolic blood<br>pressure  | TV       | 82.32  | 9.52  | 80     | 60-110    | 0.0074 |
|                                                | TCpre11  | 73.99  | 12.64 | 72     | 48-98     |        |
|                                                | TCpost11 | 78.42  | 12.22 | 80     | 49-111    |        |
| Post-transplant<br>systolic blood<br>pressure  | TV       | 124.69 | 6.95  | 122.00 | 101-140   | 0.0001 |
|                                                | TCpre11  | 124.99 | 10.72 | 130.00 | 100-140   |        |
|                                                | TCpost11 | 127.72 | 9.23  | 130.00 | 100-145   |        |
| Post-transplant<br>diastolic blood<br>pressure | TV       | 81.02  | 7.51  | 80.00  | 60-97     | 0.0002 |
|                                                | TCpre11  | 74.17  | 10.51 | 72.00  | 60-96     |        |
|                                                | TCpost11 | 76.90  | 9.05  | 80.00  | 60-95     |        |
| Ischemia time                                  | TV       | 10.05  | 2.63  | 10.00  | 6-14      | 0.0001 |
|                                                | TCpre11  | 18.73  | 5.45  | 20.00  | 7-29      |        |
|                                                | TCpost11 | 19.36  | 3.68  | 18.00  | 13-28     |        |
| Urethral<br>catheter<br>duration (days)        | TV       | 7.95   | 1.98  | 7.00   | 6-12      | 0.0003 |
|                                                | TCpre11  | 8.66   | 3.79  | 8.00   | 6-30      |        |
|                                                | TCpost11 | 19.06  | 22.48 | 10.00  | 6-98      |        |

|                                |          |       |       |       |        |        |
|--------------------------------|----------|-------|-------|-------|--------|--------|
| Double-J stent duration (days) | TV       | 58.33 | 16.11 | 60.00 | 30-85  | 0.0006 |
|                                | TCpre11  | 50.64 | 12.86 | 54.00 | 30-80  |        |
|                                | TCpost11 | 62.21 | 23.34 | 61.00 | 24-180 |        |

Table S2. SEX. PRE-TRANSPLANT UTI. UTI TREATMENT. CONCOMITANT DISEASES. SMOKER. TYPE OF DIALYSIS. ACUTE REJECTION. FUNCTIONAL OUTCOME.

| GROUPS             | TV and TCpre11 |       |                |       |              |       |         | TV and TCpost11 |       |                 |     |                |       |         | TCpre11 and TCpost11 |       |                 |     |               |       |         |
|--------------------|----------------|-------|----------------|-------|--------------|-------|---------|-----------------|-------|-----------------|-----|----------------|-------|---------|----------------------|-------|-----------------|-----|---------------|-------|---------|
|                    | n              | %     | n              | %     | n            | %     | p-value | n               | %     | N               | %   | n              | %     | p-value | n                    | %     | n               | %   | n             | %     | p-value |
| SEX                | TV, n=150      |       | TCpre11, n=650 |       | Total, n=800 |       |         | TV, n=150       |       | TCpost11, n=500 |     | Overall, n=650 |       |         | TCpre11, n=650       |       | TCpost11, n=500 |     | Total, n=1150 |       |         |
| Female             | 46             | 30.67 | 267            | 41.08 | 313          | 39.13 | 0.0203  | 46              | 30.67 | 180             | 36  | 226            | 34.77 | 0.2421  | 267                  | 41.08 | 180             | 36  | 447           | 38.87 | 0.0876  |
| Male               | 104            | 69.33 | 383            | 58.92 | 487          | 60.88 | 0.0203  | 104             | 69.33 | 320             | 64  | 424            | 65.23 | 0.2421  | 383                  | 58.92 | 320             | 64  | 703           | 61.13 | 0.0876  |
| PRE-TRANSPLANT UTI | TV, n=150      |       | TCpre11, n=650 |       | Total, n=800 |       |         | TV, n=150       |       | TCpost11, n=500 |     | Total, n=650   |       |         | TCpre11, n=650       |       | TCpost11, n=500 |     | Total, n=1150 |       |         |
| Pre-transplant UTI | 18             | 12    | 167            | 25.69 | 185          | 23.13 | 0.0002  | 18              | 12.00 | 46              | 9.2 | 64             | 9.85  | 0.3481  | 167                  | 25.69 | 46              | 9.2 | 213           | 18.52 |         |
| UTI TREATMENT      | TV, n=150      |       | TCpre11, n=650 |       | Total, n=800 |       |         | TV, n=150       |       | TCpost11, n=500 |     | Total, n=650   |       |         | TCpre11, n=650       |       | TCpost11, n=500 |     | Total, n=1150 |       |         |
| UTI treatment      | n              | %     | n              | %     | n            | %     | p-value | n               | %     | n               | %   | n              | %     | p-value | n                    | %     | n               | %   | n             | %     | p-value |
| Antibiotic         | 2              | 1.33  | 100            | 15.38 | 102          | 12.75 | 0.0108  | 2               | 1.33  | 24              | 4.8 | 26             | 4     | 0.0593  | 100                  | 66.46 | 24              | 4.8 | 124           | 10.78 | 0.0001  |

|                               |           |       |                |       |              |       |         |           |       |                 |      |              |       |         |                |       |                 |      |              |       |         |
|-------------------------------|-----------|-------|----------------|-------|--------------|-------|---------|-----------|-------|-----------------|------|--------------|-------|---------|----------------|-------|-----------------|------|--------------|-------|---------|
| prophylaxis                   |           |       |                |       |              |       |         |           |       |                 |      |              |       |         |                |       |                 |      |              |       |         |
| Antibiotic demand             | 16        | 10.67 | 432            | 66.46 | 448          | 56    | 0.0001  | 16        | 10.67 | 149             | 29.8 | 165          | 25.38 | 0.0001  | 432            | 5.08  | 149             | 29.8 | 581          | 50.52 | 0.0001  |
| Vaccine                       |           |       |                |       |              |       |         |           |       |                 |      |              |       |         | 33             | 5.08  | 11              | 2.2  | 44           | 3.83  | 0.0127  |
| Mannose                       |           |       |                |       |              |       |         |           |       |                 |      |              |       |         | 33             | 5.08  | 11              | 2.2  | 44           | 3.83  | 0.0127  |
| None                          | 132       | 88    | 118            | 18.15 | 250          | 31.25 | 0.0001  | 132       | 88.00 | 323             | 64.6 | 455          | 70    | 0.0001  | 118            | 18.15 | 323             | 64.6 | 441          | 38.35 | 0.0001  |
| CONCOMITANT DISEASES          | TV, n=150 |       | TCpre11, n=650 |       | Total, n=800 |       |         | TV, n=150 |       | TCpost11, n=500 |      | Total, n=650 |       |         | TCpre11, n=650 |       | TCpost11, n=500 |      | Total, n=150 |       |         |
| HT                            | 124       | 82.67 | 551            | 84.77 | 675          | 84.38 | 0.5334  | 124       | 82.67 | 444             | 88.8 | 568          | 87.38 | 0.0507  | 551            | 84.77 | 444             | 88.8 | 995          | 86.52 | 0.0551  |
| DM2                           | 27        | 18    | 133            | 20.46 | 160          | 20    | 0.5715  | 27        | 18.00 | 173             | 34.6 | 200          | 30.77 | 0.0001  | 133            | 20.46 | 173             | 34.6 | 306          | 26.61 | 0.0001  |
| Dyslipidemia                  | 79        | 52.67 | 316            | 48.62 | 395          | 49.38 | 0.4150  | 79        | 52.67 | 280             | 56   | 359          | 55.23 | 0.5125  | 316            | 48.62 | 280             | 56   | 596          | 51.83 | 0.0146  |
| Hyperuricemia                 | 45        | 30    | 183            | 28.15 | 228          | 28.5  | 0.6883  | 45        | 30.00 | 131             | 26.2 | 176          | 27.08 | 0.4020  | 183            | 28.15 | 131             | 26.2 | 314          | 27.3  | 0.5044  |
| Former smoker                 | 10        | 6.67  | 83             | 12.77 | 93           | 11.63 | 0.0344  | 10        | 6.67  | 102             | 20.4 | 112          | 17.23 | 0.0001  | 83             | 12.77 | 102             | 20.4 | 185          | 16.09 | 0.0006  |
| Smoker                        | 10        | 6.67  | 68             | 10.46 | 78           | 9.75  | 0.1723  | 10        | 6.67  | 56              | 11.2 | 66           | 10.15 | 0.1237  | 68             | 10.46 | 56              | 11.2 | 124          | 10.78 | 0.7021  |
| TYPE OF PREOPERATIVE DIALYSIS | TV, n=150 |       | TCpre11, n=650 |       | Total, n=800 |       |         | TV, n=150 |       | TCpost11, n=500 |      | Total, n=650 |       |         | TCpre11, n=650 |       | TCpost11, n=500 |      | Total, n=150 |       |         |
| Peritoneal dialysis           | 6         | 4     | 84             | 12.92 | 90           | 11.25 | 0.0009  | 6         | 4.00  | 79              | 15.8 | 85           | 13.08 | 0.0001  | 84             | 12.92 | 79              | 15.8 | 163          | 14.17 | 0.1731  |
| Haemodialysis                 | 43        | 28.67 | 465            | 71.54 | 508          | 63.5  | 0.0001  | 43        | 28.67 | 172             | 34.4 | 215          | 33.08 | 0.1998  | 465            | 71.54 | 172             | 34.4 | 637          | 55.39 | 0.0001  |
| None                          | 101       | 67.33 | 134            | 20.62 | 235          | 29.38 | 0.0001  | 101       | 67.33 | 297             | 59.4 | 398          | 61.23 | 0.0859  | 134            | 20.62 | 297             | 59.4 | 431          | 37.48 | 0.0001  |
| POSTOPERATIVE                 | TV, n=150 |       | TCpre11, n=650 |       | Total, n=800 |       | p-value | TV, n=150 |       | TCpost11, n=500 |      | Total, n=650 |       | p-value | TCpre11, n=650 |       | TCpost11, n=500 |      | Total, n=150 |       | p-value |

| DIALYSIS                 |                |       |                 |       |               |            |        |           |       | n=500           |      |               |       |        | n=650          |       | n=500           |       |               |            |        |
|--------------------------|----------------|-------|-----------------|-------|---------------|------------|--------|-----------|-------|-----------------|------|---------------|-------|--------|----------------|-------|-----------------|-------|---------------|------------|--------|
| Yes                      | 49             | 32.67 | 167             | 25.69 | 216           | 27         | 0.0840 | 49        | 32.67 | 109             | 21.8 | 158           | 24.31 | 0.0090 | 167            | 25.69 | 109             | 21.8  | 276           | 24         | 0.1435 |
| No                       | 101            | 67.33 | 483             | 74.31 | 584           | 73         | 0.0840 | 101       | 67.33 | 391             | 78.2 | 492           | 75.69 | 0.0090 | 483            | 74.31 | 391             | 78.2  | 874           | 76         | 0.1435 |
| ACUTE REJECTION          | TV, n=150      |       | TCpre11, n=650  |       | Total, n=1300 |            |        | TV, n=150 |       | TCpost11, n=500 |      | Total, n=1300 |       |        | TCpre11, n=650 |       | TCpost11, n=500 |       | Total, n=1300 |            |        |
| Yes                      | 14             | 9.33  | 96              | 14.77 | 110           | 13.75      | 0.0330 | 14        | 9.33  | 49              | 9.8  | 63            | 9.69  | 0.6318 | 96             | 14.77 | 49              | 9.8   | 145           | 12.6086957 | 0.0121 |
| No                       | 136            | 90.67 | 554             | 85.23 | 690           | 86.25      | 0.0330 | 136       | 90.67 | 451             | 90.2 | 587           | 90.31 | 0.6318 | 554            | 85.23 | 451             | 90.2  | 1005          | 87.3913043 | 0.0121 |
| FUNCTIONAL OUTCOME       | TCpre11, n=650 |       | TCpost11, n=500 |       | Total, n=1300 |            |        | TV, n=150 |       | TCpost11, n=500 |      | Total, n=1300 |       |        | TV, n=150      |       | TCpre11, n=650  |       | Total, n=1300 |            |        |
| Good                     | 234            | 36.00 | 332             | 66.4  | 566           | 49.2173913 | 0.0001 | 133       | 88.67 | 332             | 66.4 | 465           | 71.54 | 0.0001 | 133            | 88.67 | 234             | 36.00 | 367           | 45,875     | 0.0001 |
| Grafting complications** | 332            | 51.08 | 104             | 20.8  | 436           | 37.9130435 | 0.0001 | 1         | 0.67  | 104             | 20.8 | 105           | 16.15 | 0.0001 | 1              | 0.67  | 332             | 51.08 | 333           | 41,625     | 0.0001 |
| Impaired kidney function | 67             | 10.31 | 20              | 4     | 87            | 7.56521739 | 0.0001 | 11        | 7.33  | 20              | 4    | 31            | 4.77  | 0.1232 | 11             | 7.33  | 67              | 10.31 | 78            | 9.75       | 0.3587 |
| Graft loss               | 17             | 2.62  | 44              | 8.8   | 61            | 5.30434783 | 0.0001 | 3         | 2.00  | 44              | 8.8  | 47            | 7.23  | 1.0000 | 3              | 2.00  | 17              | 2.62  | 20            | 2.5        | 1.0000 |
